# Supplementary material for: Fascinating 3D energetic [Ag2(N5)2(EDA)]n: filling the ethylenediamine molecules into a [Ag(N5)]nframework
Source: Royal Society of Chemistry journal article supplement (doi:10.1039/d2ce00086e), 2022-01-01
Supplement: d2ce00086e1.pdf [file d2ce00086e1.pdf]

## Electronic Supplementary Information

### **Fascinating 3D energetic $[\text{Ag}_2(\text{N}_5)_2(\text{EDA})]_n$ : filling the ethylenediamine molecules into $[\text{Ag}(\text{N}_5)]_n$ framework**

Xiaopeng Zhang<sup>‡,a</sup>, Tianyang Hou<sup>‡,a</sup>, Qiuhan Lin,<sup>a</sup> Pengcheng Wang,<sup>a</sup> Dongxue Li,<sup>b</sup>

Yuangan Xu<sup>\*a</sup> and Ming Lu<sup>\*a</sup>

<sup>a</sup> School of Chemistry and Chemical Engineering, Nanjing University of Science and Technology, Nanjing 210094, Jiangsu, China.

<sup>b</sup> China National Quality Supervision Testing Center for Industrial Explosive Materials, Xiaolingwei 200, Nanjing 210094, Jiangsu, China.

E-mail: *yuanganxu@163.com; luming@njust.edu.cn*

## Table of Contents

|    |                                                                                                                                                                                                  |     |
|----|--------------------------------------------------------------------------------------------------------------------------------------------------------------------------------------------------|-----|
| 1. | Crystal data and structure refinement details of $[\text{Ag}_2(\text{N}_5)_2(\text{EDA})]_n$ , $[\text{Ag}(\text{N}_5)]_n$ and $[\text{Ag}_3(\text{N}_5)_4]_n \cdot n[\text{Ag}(\text{NH}_3)_2]$ | S3  |
| 2. | Single-crystal X-ray diffraction analysis of $[\text{Ag}_2(\text{N}_5)_2(\text{EDA})]_n$                                                                                                         | S4  |
| 3. | Single-crystal X-ray diffraction analysis of $[\text{Ag}_3(\text{N}_5)_4]_n \cdot n[\text{Ag}(\text{NH}_3)_2]$                                                                                   | S6  |
| 4. | The noncovalent interactions study                                                                                                                                                               | S10 |
| 5. | IR spectrum                                                                                                                                                                                      | S12 |
| 6. | TG curve                                                                                                                                                                                         | S12 |
|    | Reference                                                                                                                                                                                        | S13 |

1. Crystal data and structure refinement details of  $[\text{Ag}_2(\text{N}_5)_2(\text{EDA})]_n$ ,  $[\text{Ag}(\text{N}_5)]_n$  and  $[\text{Ag}_3(\text{N}_5)_4]_n \cdot n[\text{Ag}(\text{NH}_3)_2]$

**Table S1.** Crystal data and structure refinement details of  $[\text{Ag}_2(\text{N}_5)_2(\text{EDA})]_n$ ,  $[\text{Ag}(\text{N}_5)]_n$  and  $[\text{Ag}_3(\text{N}_5)_4]_n \cdot n[\text{Ag}(\text{NH}_3)_2]$

|                                   | $[\text{Ag}_2(\text{N}_5)_2(\text{EDA})]_n$                                                                                   | $[\text{Ag}_3(\text{N}_5)_4]_n \cdot n[\text{Ag}(\text{NH}_3)_2]$                                                              | $[\text{Ag}(\text{N}_5)]_n^1$                                                                                          |
|-----------------------------------|-------------------------------------------------------------------------------------------------------------------------------|--------------------------------------------------------------------------------------------------------------------------------|------------------------------------------------------------------------------------------------------------------------|
| CCDC                              | 2124736                                                                                                                       | 1884910                                                                                                                        | 1816845 <sup>8</sup>                                                                                                   |
| Empirical formula                 | $\text{CH}_4\text{AgN}_6$                                                                                                     | $\text{Ag}_4\text{H}_6\text{N}_{22}$                                                                                           | $\text{Ag}_{16}\text{N}_{80}$                                                                                          |
| Formula weight                    | 207.97                                                                                                                        | 745.75                                                                                                                         | 2846.72                                                                                                                |
| Temperature                       | 170.0 K                                                                                                                       | 220 K                                                                                                                          | 173 K                                                                                                                  |
| Wavelength                        | 0.71073 Å                                                                                                                     | 0.71073 Å                                                                                                                      | 0.71073 Å                                                                                                              |
| Crystal system                    | Monoclinic                                                                                                                    | Monoclinic                                                                                                                     | orthorhombic                                                                                                           |
| Space group                       | $P2_1/c$                                                                                                                      | $P2_1/c$                                                                                                                       | Fddd                                                                                                                   |
| Unit cell dimensions              | a=7.7903(2) Å<br>b=8.9945(3) Å<br>c=8.0367(2) Å<br>$\alpha=90.00^\circ$<br>$\beta=116.1130(10)^\circ$<br>$\gamma=90.00^\circ$ | a=9.0932(18) Å<br>b=9.1069(17) Å<br>c=9.8502(19) Å<br>$\alpha=90.00^\circ$<br>$\beta=108.847(4)^\circ$<br>$\gamma=90.00^\circ$ | a=11.904(2) Å<br>b=15.240(3) Å<br>c=17.282(3) Å<br>$\alpha=90.00^\circ$<br>$\beta=90.00^\circ$<br>$\gamma=90.00^\circ$ |
| Volume                            | 505.65(3) Å <sup>3</sup>                                                                                                      | 772.0(3) Å <sup>3</sup>                                                                                                        | 3135.3(10) Å <sup>3</sup>                                                                                              |
| Z                                 | 4                                                                                                                             | 2                                                                                                                              | 2                                                                                                                      |
| Density (calculated)              | 2.732 g·cm <sup>-3</sup>                                                                                                      | 3.208 g·cm <sup>-3</sup>                                                                                                       | 3.015 g·cm <sup>-3</sup>                                                                                               |
| Absorption coefficient            | 3.870 mm <sup>-1</sup>                                                                                                        | 5.046 mm <sup>-1</sup>                                                                                                         | 4.958 mm <sup>-1</sup>                                                                                                 |
| F(000)                            | 396.0                                                                                                                         | 696.0                                                                                                                          | 2624.0                                                                                                                 |
| Crystal size                      | 0.15 x 0.08 x 0.05 mm <sup>3</sup>                                                                                            | 0.12 x 0.06 x 0.03 mm <sup>3</sup>                                                                                             | 0.07 x 0.03 x 0.03 mm <sup>3</sup>                                                                                     |
| Theta range for data collection   | 7.24 to 55.074 °                                                                                                              | 4.734 to 54.35°                                                                                                                | 4.94 to 49.988°                                                                                                        |
| Index ranges                      | -8 ≤ h ≤ 10, -11 ≤ k ≤ 11, -10 ≤ l ≤ 9                                                                                        | -11 ≤ h ≤ 11, -11 ≤ k ≤ 11, -12 ≤ l ≤ 12                                                                                       | —                                                                                                                      |
| Reflections collected             | 5749                                                                                                                          | 6195                                                                                                                           | 688                                                                                                                    |
| Independent reflections           | 1132 [R(int) = 0.0402, R(sigma)=0.0283]                                                                                       | 1710 [R(int) = 0.0828, R(sigma)=0.0781]                                                                                        | 688 [R(int) = 0, R(sigma)=0.1548]                                                                                      |
| Data / restraints / parameters    | 1132/0/73                                                                                                                     | 1710/0/122                                                                                                                     | 688/30/56                                                                                                              |
| Goodness-of-fit on F <sup>2</sup> | 1.120                                                                                                                         | 0.971                                                                                                                          | 1.122                                                                                                                  |
| Final R indices [I > 2σ(I)]       | R1=0.0188, wR <sub>2</sub> =0.0412                                                                                            | R1=0.0415, wR <sub>2</sub> =0.0654                                                                                             | R1=0.1063, wR <sub>2</sub> =0.2723                                                                                     |
| R indices (all data)              | R1=0.0216, wR <sub>2</sub> =0.0430                                                                                            | R1=0.1100, wR <sub>2</sub> =0.0840                                                                                             | R1=0.1816,                                                                                                             |

|                             |                                    |                                  |                                  |
|-----------------------------|------------------------------------|----------------------------------|----------------------------------|
|                             |                                    |                                  | wR <sub>2</sub> =0.2892          |
| Largest diff. peak and hole | 0.311 and -0.308 e.Å <sup>-3</sup> | 0.95 and -0.86 e.Å <sup>-3</sup> | 1.64 and -1.77 e.Å <sup>-3</sup> |

## 2. Single-crystal X-ray diffraction analysis of [Ag<sub>2</sub>(N<sub>5</sub>)<sub>2</sub>(EDA)]<sub>n</sub>

**Table S2.** Crystal data, data collection, and refinement for [Ag<sub>2</sub>(N<sub>5</sub>)<sub>2</sub>(EDA)]<sub>n</sub>

|                                                                                                                                                                                                                                                                      |                                                                        |
|----------------------------------------------------------------------------------------------------------------------------------------------------------------------------------------------------------------------------------------------------------------------|------------------------------------------------------------------------|
| CH <sub>4</sub> AgN <sub>6</sub>                                                                                                                                                                                                                                     | $F(000) = 396$                                                         |
| $M_r = 207.97$                                                                                                                                                                                                                                                       | $D_x = 2.732 \text{ Mg m}^{-3}$                                        |
| Monoclinic, $P2_1/c$                                                                                                                                                                                                                                                 | Mo $K\alpha$ radiation, $\lambda = 0.71073 \text{ \AA}$                |
| $a = 7.7903 (2) \text{ \AA}$                                                                                                                                                                                                                                         | Cell parameters from 4340 reflections                                  |
| $b = 8.9945 (3) \text{ \AA}$                                                                                                                                                                                                                                         | $\theta = 3.6\text{--}27.5^\circ$                                      |
| $c = 8.0367 (2) \text{ \AA}$                                                                                                                                                                                                                                         | $\mu = 3.87 \text{ mm}^{-1}$                                           |
| $\beta = 116.113 (1)^\circ$                                                                                                                                                                                                                                          | $T = 170 \text{ K}$                                                    |
| $V = 505.65 (3) \text{ \AA}^3$                                                                                                                                                                                                                                       | Block, colourless                                                      |
| $Z = 4$                                                                                                                                                                                                                                                              | $0.15 \times 0.08 \times 0.05 \text{ mm}$                              |
| D8 VENTURE diffractometer                                                                                                                                                                                                                                            | 1051 reflections with $I > 2\sigma(I)$                                 |
| $\phi$ and $\omega$ scans                                                                                                                                                                                                                                            | $R_{\text{int}} = 0.040$                                               |
| Absorption correction: multi-scan SADABS2016/2 (Bruker,2016/2) was used for absorption correction. wR2(int) was 0.0810 before and 0.0542 after correction. The Ratio of minimum to maximum transmission is 0.8128. The $\lambda/2$ correction factor is Not present. | $\theta_{\text{max}} = 27.5^\circ$ , $\theta_{\text{min}} = 3.6^\circ$ |
| $T_{\text{min}} = 0.754$ , $T_{\text{max}} = 0.928$                                                                                                                                                                                                                  | $h = -8 \rightarrow 10$                                                |
| 5749 measured reflections                                                                                                                                                                                                                                            | $k = -11 \rightarrow 11$                                               |
| 1132 independent reflections                                                                                                                                                                                                                                         | $l = -10 \rightarrow 9$                                                |
| Refinement on $F^2$                                                                                                                                                                                                                                                  | Primary atom site location: dual                                       |
| Least-squares matrix: full                                                                                                                                                                                                                                           | Hydrogen site location: inferred from neighbouring sites               |
| $R[F^2 > 2\sigma(F^2)] = 0.019$                                                                                                                                                                                                                                      | H-atom parameters constrained                                          |
| $wR(F^2) = 0.043$                                                                                                                                                                                                                                                    | $w = 1/[\sigma^2(F_o^2) + 0.4594P]$<br>where $P = (F_o^2 + 2F_c^2)/3$  |
| $S = 1.12$                                                                                                                                                                                                                                                           | $(\Delta/\sigma)_{\text{max}} < 0.001$                                 |
| 1132 reflections                                                                                                                                                                                                                                                     | $\Delta_{\text{max}} = 0.41 \text{ e \AA}^{-3}$                        |
| 73 parameters                                                                                                                                                                                                                                                        | $\Delta_{\text{min}} = -0.38 \text{ e \AA}^{-3}$                       |
| 0 restraints                                                                                                                                                                                                                                                         |                                                                        |

**Table S3.** Fractional atomic coordinates and isotropic or equivalent isotropic displacement parameters ( $\text{\AA}^2$ ) for  $[\text{Ag}_2(\text{N}_5)_2(\text{EDA})]_n$

|     | x           | y           | z           | $U_{\text{iso}}^*/U_{\text{eq}}$ |
|-----|-------------|-------------|-------------|----------------------------------|
| Ag1 | 0.68902 (3) | 0.17021 (2) | 0.58482 (2) | 0.02381 (8)                      |
| N6  | 0.2354 (3)  | 0.4808 (2)  | 0.5357 (3)  | 0.0256 (4)                       |
| N5  | 0.3148 (3)  | 0.3813 (2)  | 0.4706 (3)  | 0.0227 (4)                       |
| N1  | 0.9749 (3)  | 0.1918 (2)  | 0.5794 (3)  | 0.0192 (4)                       |
| H1B | 0.982000    | 0.282982    | 0.533611    | 0.023*                           |
| H1A | 1.068748    | 0.186747    | 0.697592    | 0.023*                           |
| N4  | 0.3431 (3)  | 0.4920 (2)  | 0.7161 (3)  | 0.0230 (4)                       |
| N2  | 0.4705 (3)  | 0.3311 (2)  | 0.6109 (3)  | 0.0218 (4)                       |
| N3  | 0.4886 (3)  | 0.3997 (2)  | 0.7628 (3)  | 0.0230 (4)                       |
| C1  | 1.0105 (4)  | 0.0772 (3)  | 0.4673 (3)  | 0.0199 (5)                       |
| H1C | 1.141233    | 0.089316    | 0.477773    | 0.024*                           |
| H1D | 0.918657    | 0.089459    | 0.335407    | 0.024*                           |

**Table S4.** Atomic displacement parameters ( $\text{\AA}^2$ ) for  $[\text{Ag}_2(\text{N}_5)_2(\text{EDA})]_n$

|     | $U^{11}$     | $U^{22}$     | $U^{33}$     | $U^{12}$    | $U^{13}$    | $U^{23}$     |
|-----|--------------|--------------|--------------|-------------|-------------|--------------|
| Ag1 | 0.02235 (13) | 0.02716 (13) | 0.02388 (12) | 0.00002 (7) | 0.01197 (9) | -0.00276 (8) |
| N6  | 0.0219 (11)  | 0.0266 (11)  | 0.0245 (11)  | 0.0034 (9)  | 0.0069 (9)  | 0.0004 (9)   |
| N5  | 0.0182 (10)  | 0.0270 (11)  | 0.0186 (10)  | 0.0003 (8)  | 0.0041 (8)  | -0.0006 (9)  |
| N1  | 0.0209 (11)  | 0.0167 (10)  | 0.0192 (10)  | 0.0000 (8)  | 0.0080 (8)  | 0.0005 (8)   |
| N4  | 0.0235 (11)  | 0.0232 (11)  | 0.0220 (10)  | 0.0019 (8)  | 0.0098 (8)  | -0.0022 (9)  |
| N2  | 0.0243 (11)  | 0.0223 (11)  | 0.0192 (10)  | 0.0018 (8)  | 0.0100 (9)  | -0.0006 (8)  |
| N3  | 0.0233 (11)  | 0.0258 (11)  | 0.0177 (10)  | 0.0046 (9)  | 0.0068 (9)  | 0.0011 (9)   |
| C1  | 0.0227 (13)  | 0.0187 (12)  | 0.0206 (12)  | 0.0004 (9)  | 0.0117 (10) | 0.0018 (10)  |

**Table S5.** Geometric parameters ( $\text{\AA}$ ,  $^\circ$ ) for  $[\text{Ag}_2(\text{N}_5)_2(\text{EDA})]_n$

|                      |           |                      |           |
|----------------------|-----------|----------------------|-----------|
| Ag1—N1               | 2.255 (2) | N1—H1A               | 0.9100    |
| Ag1—N4 <sup>i</sup>  | 2.355 (2) | N1—C1                | 1.474 (3) |
| Ag1—N2               | 2.313 (2) | N4—N3                | 1.319 (3) |
| Ag1—N3 <sup>ii</sup> | 2.444 (2) | N2—N3                | 1.319 (3) |
| N6—N5                | 1.319 (3) | C1—C1 <sup>iii</sup> | 1.520 (4) |
| N6—N4                | 1.321 (3) | C1—H1C               | 0.9900    |
| N5—N2                | 1.320 (3) | C1—H1D               | 0.9900    |
| N1—H1B               | 0.9100    |                      |           |
|                      |           |                      |           |

|                                       |             |                           |             |
|---------------------------------------|-------------|---------------------------|-------------|
| N1—Ag1—N4 <sup>i</sup>                | 118.24 (7)  | N3—N4—Ag1 <sup>iv</sup>   | 124.75 (15) |
| N1—Ag1—N2                             | 136.08 (7)  | N3—N4—N6                  | 108.39 (19) |
| N1—Ag1—N3 <sup>ii</sup>               | 100.25 (7)  | N5—N2—Ag1                 | 124.93 (16) |
| N4 <sup>i</sup> —Ag1—N3 <sup>ii</sup> | 109.55 (7)  | N3—N2—Ag1                 | 126.40 (16) |
| N2—Ag1—N4 <sup>i</sup>                | 93.54 (7)   | N3—N2—N5                  | 108.34 (19) |
| N2—Ag1—N3 <sup>ii</sup>               | 95.97 (7)   | N4—N3—Ag1 <sup>v</sup>    | 122.14 (15) |
| N5—N6—N4                              | 107.76 (19) | N4—N3—N2                  | 107.60 (19) |
| N6—N5—N2                              | 107.9 (2)   | N2—N3—Ag1 <sup>v</sup>    | 128.17 (15) |
| Ag1—N1—H1B                            | 108.8       | N1—C1—C1 <sup>iii</sup>   | 110.5 (2)   |
| Ag1—N1—H1A                            | 108.8       | N1—C1—H1C                 | 109.6       |
| H1B—N1—H1A                            | 107.7       | N1—C1—H1D                 | 109.6       |
| C1—N1—Ag1                             | 113.89 (14) | C1 <sup>iii</sup> —C1—H1C | 109.6       |
| C1—N1—H1B                             | 108.8       | C1 <sup>iii</sup> —C1—H1D | 109.6       |
| C1—N1—H1A                             | 108.8       | H1C—C1—H1D                | 108.1       |
| N6—N4—Ag1 <sup>iv</sup>               | 126.26 (15) |                           |             |

Symmetry codes: (i)  $-x+1, y-1/2, -z+3/2$ ; (ii)  $x, -y+1/2, z-1/2$ ; (iii)  $-x+2, -y, -z+1$ ; (iv)  $-x+1, y+1/2, -z+3/2$ ; (v)  $x, -y+1/2, z+1/2$ .

**Table S6.** Hydrogen bonds (Å, °) for  $[\text{Ag}_2(\text{N}_5)_2(\text{EDA})]_n$

| $D\text{---}H\cdots A$ | $D\text{---}H$ | $H\cdots A$ | $D\cdots A$ | $D\text{---}H\cdots A$ |
|------------------------|----------------|-------------|-------------|------------------------|
| N1—H1A $\cdots$ N5     | 0.91           | 2.27        | 3.162(3)    | 166                    |
| N1—H1B $\cdots$ N6     | 0.91           | 2.62        | 3.298(3)    | 132                    |

### 3. Single-crystal X-ray diffraction analysis of $[\text{Ag}_3(\text{N}_5)_4]_n \cdot n[\text{Ag}(\text{NH}_3)_2]$

**Table S7.** Crystal data, data collection, and refinement for  $[\text{Ag}_3(\text{N}_5)_4]_n \cdot n[\text{Ag}(\text{NH}_3)_2]$

|                                                              |                                                         |
|--------------------------------------------------------------|---------------------------------------------------------|
| $0.5(\text{Ag}_6\text{N}_{40}) \cdot \text{AgH}_6\text{N}_2$ | $F(000) = 696$                                          |
| $M_r = 745.75$                                               | $D_x = 3.208 \text{ Mg m}^{-3}$                         |
| Monoclinic, $P2_1/c$                                         | Mo $K\alpha$ radiation, $\lambda = 0.71073 \text{ \AA}$ |
| $a = 9.0932 (18) \text{ \AA}$                                | Cell parameters from 2704 reflections                   |
| $b = 9.1069 (17) \text{ \AA}$                                | $\theta = 2.4\text{--}22.3^\circ$                       |
| $c = 9.8502 (19) \text{ \AA}$                                | $\mu = 5.05 \text{ mm}^{-1}$                            |
| $\beta = 108.847 (4)^\circ$                                  | $T = 220 \text{ K}$                                     |
| $V = 772.0 (3) \text{ \AA}^3$                                | Plate, colourless                                       |
| $Z = 2$                                                      | $0.12 \times 0.06 \times 0.03 \text{ mm}$               |
| Bruker APEX-II CCD diffractometer                            | 857 reflections with $I > 2\sigma(I)$                   |
| $\phi$ and $\omega$ scans                                    | $R_{\text{int}} = 0.083$                                |

|                                                                                                                                                                                                                                                                                |                                                                           |
|--------------------------------------------------------------------------------------------------------------------------------------------------------------------------------------------------------------------------------------------------------------------------------|---------------------------------------------------------------------------|
| Absorption correction: multi-scan <i>SADABS2014/5</i> (Bruker,2014/5) was used for absorption correction. <i>wR2(int)</i> was 0.0746 before and 0.0561 after correction. The Ratio of minimum to maximum transmission is 0.9221. The $\lambda/2$ correction factor is 0.00150. | $\theta_{\max} = 27.2^\circ$ , $\theta_{\min} = 2.4^\circ$                |
| $T_{\min} = 0.687$ , $T_{\max} = 0.746$                                                                                                                                                                                                                                        | $h = -11 \rightarrow 11$                                                  |
| 6195 measured reflections                                                                                                                                                                                                                                                      | $k = -11 \rightarrow 11$                                                  |
| 1710 independent reflections                                                                                                                                                                                                                                                   | $l = -12 \rightarrow 12$                                                  |
| Refinement on $F^2$                                                                                                                                                                                                                                                            | Primary atom site location: dual                                          |
| Least-squares matrix: full                                                                                                                                                                                                                                                     | Hydrogen site location: inferred from neighbouring sites                  |
| $R[F^2 > 2\sigma(F^2)] = 0.042$                                                                                                                                                                                                                                                | H-atom parameters constrained                                             |
| $wR(F^2) = 0.084$                                                                                                                                                                                                                                                              | $w = 1/[\sigma^2(F_o^2) + (0.0227P)^2]$<br>where $P = (F_o^2 + 2F_c^2)/3$ |
| $S = 0.97$                                                                                                                                                                                                                                                                     | $(\Delta/\sigma)_{\max} < 0.001$                                          |
| 1710 reflections                                                                                                                                                                                                                                                               | $\Delta)_{\max} = 0.95 \text{ e } \text{\AA}^{-3}$                        |
| 122 parameters                                                                                                                                                                                                                                                                 | $\Delta)_{\min} = -0.86 \text{ e } \text{\AA}^{-3}$                       |
| 0 restraints                                                                                                                                                                                                                                                                   |                                                                           |

**Table S8.** Fractional atomic coordinates and isotropic or equivalent isotropic displacement parameters ( $\text{\AA}^2$ ) for  $[\text{Ag}_3(\text{N}_5)_4]_n \cdot n[\text{Ag}(\text{NH}_3)_2]$

|      | <i>x</i>    | <i>y</i>    | <i>z</i>     | $U_{\text{iso}}^*/U_{\text{eq}}$ |
|------|-------------|-------------|--------------|----------------------------------|
| Ag1  | 1.000000    | 0.500000    | 0.500000     | 0.0287 (3)                       |
| Ag3  | 0.500000    | 1.000000    | 0.500000     | 0.0322 (3)                       |
| Ag2  | 0.25565 (9) | 0.66969 (6) | 0.25037 (11) | 0.0317 (2)                       |
| N1   | 0.4871 (8)  | 0.5383 (7)  | 0.3416 (8)   | 0.0231 (17)                      |
| N2   | 0.6261 (8)  | 0.5879 (7)  | 0.4086 (8)   | 0.0239 (18)                      |
| N3   | 0.7248 (8)  | 0.4807 (7)  | 0.4176 (8)   | 0.0246 (17)                      |
| N4   | 0.6469 (7)  | 0.3632 (7)  | 0.3540 (8)   | 0.0244 (18)                      |
| N5   | 0.4956 (9)  | 0.3979 (8)  | 0.3050 (9)   | 0.029 (2)                        |
| N6   | 0.0747 (8)  | 0.8011 (7)  | 0.3250 (8)   | 0.0247 (18)                      |
| N7   | 0.0017 (9)  | 0.7595 (7)  | 0.4154 (8)   | 0.0270 (18)                      |
| N8   | -0.1077 (8) | 0.8574 (7)  | 0.4089 (9)   | 0.0291 (19)                      |
| N9   | -0.1007 (8) | 0.9592 (8)  | 0.3170 (8)   | 0.0245 (17)                      |
| N10  | 0.0139 (8)  | 0.9259 (7)  | 0.2678 (9)   | 0.0234 (19)                      |
| N11  | 0.6862 (8)  | 0.8595 (7)  | 0.6031 (8)   | 0.0284 (18)                      |
| H11A | 0.716977    | 0.811875    | 0.536911     | 0.034*                           |
| H11B | 0.655417    | 0.793812    | 0.656721     | 0.034*                           |
| H11C | 0.765825    | 0.912661    | 0.659913     | 0.034*                           |

**Table S9.** Atomic displacement parameters ( $\text{\AA}^2$ ) for  $[\text{Ag}_3(\text{N}_5)_4]_n \cdot n[\text{Ag}(\text{NH}_3)_2]$ 

|     | $U^{11}$   | $U^{22}$   | $U^{33}$   | $U^{12}$    | $U^{13}$   | $U^{23}$    |
|-----|------------|------------|------------|-------------|------------|-------------|
| Ag1 | 0.0183 (6) | 0.0268 (6) | 0.0396 (8) | -0.0020 (5) | 0.0073 (5) | 0.0046 (6)  |
| Ag3 | 0.0352 (7) | 0.0327 (7) | 0.0315 (7) | 0.0006 (5)  | 0.0148 (6) | -0.0015 (6) |
| Ag2 | 0.0205 (3) | 0.0171 (3) | 0.0618 (5) | 0.0020 (4)  | 0.0195 (3) | 0.0049 (5)  |
| N1  | 0.020 (4)  | 0.021 (4)  | 0.033 (5)  | 0.003 (3)   | 0.014 (4)  | 0.002 (3)   |
| N2  | 0.017 (4)  | 0.018 (4)  | 0.038 (5)  | 0.003 (3)   | 0.012 (4)  | 0.001 (4)   |
| N3  | 0.022 (4)  | 0.021 (4)  | 0.032 (5)  | 0.003 (3)   | 0.011 (4)  | -0.005 (4)  |
| N4  | 0.009 (4)  | 0.023 (4)  | 0.042 (5)  | 0.003 (3)   | 0.011 (4)  | 0.002 (4)   |
| N5  | 0.023 (4)  | 0.020 (4)  | 0.043 (6)  | -0.005 (3)  | 0.011 (4)  | 0.006 (4)   |
| N6  | 0.015 (4)  | 0.020 (4)  | 0.040 (5)  | 0.002 (3)   | 0.010 (4)  | 0.006 (4)   |
| N7  | 0.035 (5)  | 0.017 (4)  | 0.033 (5)  | 0.008 (3)   | 0.017 (4)  | 0.011 (4)   |
| N8  | 0.028 (4)  | 0.018 (4)  | 0.046 (5)  | 0.000 (3)   | 0.019 (4)  | 0.008 (4)   |
| N9  | 0.013 (4)  | 0.027 (4)  | 0.037 (5)  | 0.004 (3)   | 0.012 (4)  | -0.005 (4)  |
| N10 | 0.020 (4)  | 0.017 (4)  | 0.037 (5)  | -0.001 (3)  | 0.015 (4)  | 0.003 (4)   |
| N11 | 0.031 (4)  | 0.021 (4)  | 0.038 (5)  | -0.011 (3)  | 0.019 (4)  | -0.004 (4)  |

**Table S10.** Geometric parameters ( $\text{\AA}$ ,  $^\circ$ ) for  $[\text{Ag}_3(\text{N}_5)_4]_n \cdot n[\text{Ag}(\text{NH}_3)_2]$ 

|                                        |           |                         |           |
|----------------------------------------|-----------|-------------------------|-----------|
| Ag1—N3                                 | 2.375 (7) | N1—N5                   | 1.338 (9) |
| Ag1—N3 <sup>i</sup>                    | 2.375 (7) | N2—N3                   | 1.310 (8) |
| Ag1—N7 <sup>ii</sup>                   | 2.507 (6) | N3—N4                   | 1.324 (9) |
| Ag1—N7 <sup>iii</sup>                  | 2.507 (6) | N4—N5                   | 1.340 (9) |
| Ag1—N10 <sup>iv</sup>                  | 2.686 (8) | N6—N7                   | 1.327 (9) |
| Ag1—N10 <sup>v</sup>                   | 2.686 (8) | N6—N10                  | 1.309 (9) |
| Ag3—N11 <sup>vi</sup>                  | 2.103 (7) | N7—N8                   | 1.322 (9) |
| Ag3—N11                                | 2.103 (7) | N8—N9                   | 1.311 (9) |
| Ag2—N1                                 | 2.334 (7) | N9—N10                  | 1.318 (9) |
| Ag2—N4 <sup>vii</sup>                  | 2.353 (7) | N11—H11A                | 0.9000    |
| Ag2—N6                                 | 2.337 (7) | N11—H11B                | 0.9000    |
| Ag2—N9 <sup>viii</sup>                 | 2.345 (7) | N11—H11C                | 0.9000    |
| N1—N2                                  | 1.303 (9) |                         |           |
|                                        |           |                         |           |
| N3—Ag1—N3 <sup>i</sup>                 | 180.0     | N1—N2—N3                | 107.9 (6) |
| N3 <sup>i</sup> —Ag1—N7 <sup>iii</sup> | 85.7 (2)  | N2—N3—Ag1               | 126.3 (5) |
| N3—Ag1—N7 <sup>iii</sup>               | 94.3 (2)  | N2—N3—N4                | 108.7 (7) |
| N3 <sup>i</sup> —Ag1—N7 <sup>ii</sup>  | 94.3 (2)  | N4—N3—Ag1               | 124.4 (5) |
| N3—Ag1—N7 <sup>ii</sup>                | 85.7 (2)  | N3—N4—Ag2 <sup>iv</sup> | 126.4 (5) |
| N3—Ag1—N10 <sup>iv</sup>               | 86.3 (2)  | N3—N4—N5                | 108.1 (6) |



|                                           |            |                             |            |
|-------------------------------------------|------------|-----------------------------|------------|
| N3 <sup>i</sup> —Ag1—N10 <sup>v</sup>     | 86.3 (2)   | N5—N4—Ag2 <sup>iv</sup>     | 120.4 (6)  |
| N3 <sup>i</sup> —Ag1—N10 <sup>iv</sup>    | 93.7 (2)   | N1—N5—N4                    | 105.7 (7)  |
| N3—Ag1—N10 <sup>v</sup>                   | 93.7 (2)   | N7—N6—Ag2                   | 128.4 (5)  |
| N7 <sup>ii</sup> —Ag1—N7 <sup>iii</sup>   | 180.0      | N10—N6—Ag2                  | 123.5 (6)  |
| N7 <sup>ii</sup> —Ag1—N10 <sup>v</sup>    | 85.1 (2)   | N10—N6—N7                   | 107.6 (7)  |
| N7 <sup>iii</sup> —Ag1—N10 <sup>v</sup>   | 94.9 (2)   | N6—N7—Ag1 <sup>ix</sup>     | 123.4 (5)  |
| N7 <sup>ii</sup> —Ag1—N10 <sup>iv</sup>   | 94.9 (2)   | N8—N7—Ag1 <sup>ix</sup>     | 124.5 (5)  |
| N7 <sup>iii</sup> —Ag1—N10 <sup>iv</sup>  | 85.1 (2)   | N8—N7—N6                    | 107.8 (6)  |
| N10 <sup>iv</sup> —Ag1—N10 <sup>v</sup>   | 180.0      | N9—N8—N7                    | 107.9 (7)  |
| N11 <sup>vi</sup> —Ag3—N11                | 180.0      | N8—N9—Ag2 <sup>x</sup>      | 127.9 (5)  |
| N1—Ag2—N4 <sup>vii</sup>                  | 97.6 (2)   | N8—N9—N10                   | 108.2 (7)  |
| N1—Ag2—N6                                 | 141.3 (3)  | N10—N9—Ag2 <sup>x</sup>     | 123.9 (6)  |
| N1—Ag2—N9 <sup>viii</sup>                 | 94.3 (3)   | N6—N10—N9                   | 108.4 (7)  |
| N6—Ag2—N4 <sup>vii</sup>                  | 99.0 (2)   | Ag3—N11—H11A                | 109.5      |
| N6—Ag2—N9 <sup>viii</sup>                 | 95.1 (2)   | Ag3—N11—H11B                | 109.5      |
| N9 <sup>viii</sup> —Ag2—N4 <sup>vii</sup> | 139.9 (3)  | Ag3—N11—H11C                | 109.5      |
| N2—N1—Ag2                                 | 128.6 (5)  | H11A—N11—H11B               | 109.5      |
| N2—N1—N5                                  | 109.7 (6)  | H11A—N11—H11C               | 109.5      |
| N5—N1—Ag2                                 | 120.6 (6)  | H11B—N11—H11C               | 109.5      |
|                                           |            |                             |            |
| Ag1—N3—N4—Ag2 <sup>iv</sup>               | -17.3 (10) | N2—N1—N5—N4                 | 0.5 (10)   |
| Ag1—N3—N4—N5                              | -171.7 (5) | N2—N3—N4—Ag2 <sup>iv</sup>  | 154.0 (6)  |
| Ag1 <sup>ix</sup> —N7—N8—N9               | -158.3 (5) | N2—N3—N4—N5                 | -0.4 (10)  |
| Ag2—N1—N2—N3                              | -168.9 (5) | N3—N4—N5—N1                 | 0.0 (9)    |
| Ag2—N1—N5—N4                              | 169.7 (5)  | N5—N1—N2—N3                 | -0.7 (10)  |
| Ag2 <sup>iv</sup> —N4—N5—N1               | -156.2 (5) | N6—N7—N8—N9                 | -0.9 (9)   |
| Ag2—N6—N7—Ag1 <sup>ix</sup>               | -12.3 (10) | N7—N6—N10—N9                | -2.7 (9)   |
| Ag2—N6—N7—N8                              | -170.1 (6) | N7—N8—N9—Ag2 <sup>x</sup>   | -179.5 (6) |
| Ag2—N6—N10—N9                             | 170.0 (5)  | N7—N8—N9—N10                | -0.8 (9)   |
| Ag2 <sup>x</sup> —N9—N10—N6               | -179.1 (5) | N8—N9—N10—N6                | 2.2 (9)    |
| N1—N2—N3—Ag1                              | 171.8 (5)  | N10—N6—N7—Ag1 <sup>ix</sup> | 159.9 (5)  |
| N1—N2—N3—N4                               | 0.7 (10)   | N10—N6—N7—N8                | 2.2 (9)    |

Symmetry codes: (i)  $-x+2, -y+1, -z+1$ ; (ii)  $-x+1, -y+1, -z+1$ ; (iii)  $x+1, y, z$ ; (iv)  $-x+1, y-1/2, -z+1/2$ ; (v)  $x+1, -y+3/2, z+1/2$ ; (vi)  $-x+1, -y+2, -z+1$ ; (vii)  $-x+1, y+1/2, -z+1/2$ ; (viii)  $-x, y-1/2, -z+1/2$ ; (ix)  $x-1, y, z$ ; (x)  $-x, y+1/2, -z+1/2$ .

**Table S11.** Hydrogen bonds (Å, °) for  $[\text{Ag}_3(\text{N}_5)_4]_n \cdot n[\text{Ag}(\text{NH}_3)_2]$ 

| $D-H\cdots A$                       | $D-H$ | $H\cdots A$ | $D\cdots A$ | $D-H\cdots A$ |
|-------------------------------------|-------|-------------|-------------|---------------|
| N11—H11A $\cdots$ N2                | 0.90  | 2.40        | 3.068 (10)  | 131           |
| N11—H11A $\cdots$ N8 <sup>iii</sup> | 0.90  | 2.37        | 3.081 (10)  | 136           |
| N11—H11B $\cdots$ N5 <sup>ii</sup>  | 0.90  | 2.33        | 3.164 (9)   | 155           |
| N11—H11C $\cdots$ N3 <sup>xi</sup>  | 0.90  | 2.85        | 3.337 (10)  | 115           |
| N11—H11C $\cdots$ N10 <sup>vi</sup> | 0.90  | 2.40        | 3.261 (10)  | 160           |

Symmetry codes: (ii)  $-x+1, -y+1, -z+1$ ; (iii)  $x+1, y, z$ ; (vi)  $-x+1, -y+2, -z+1$ ; (xi)  $x, -y+3/2, z+1/2$ .

#### 4. The noncovalent interactions study

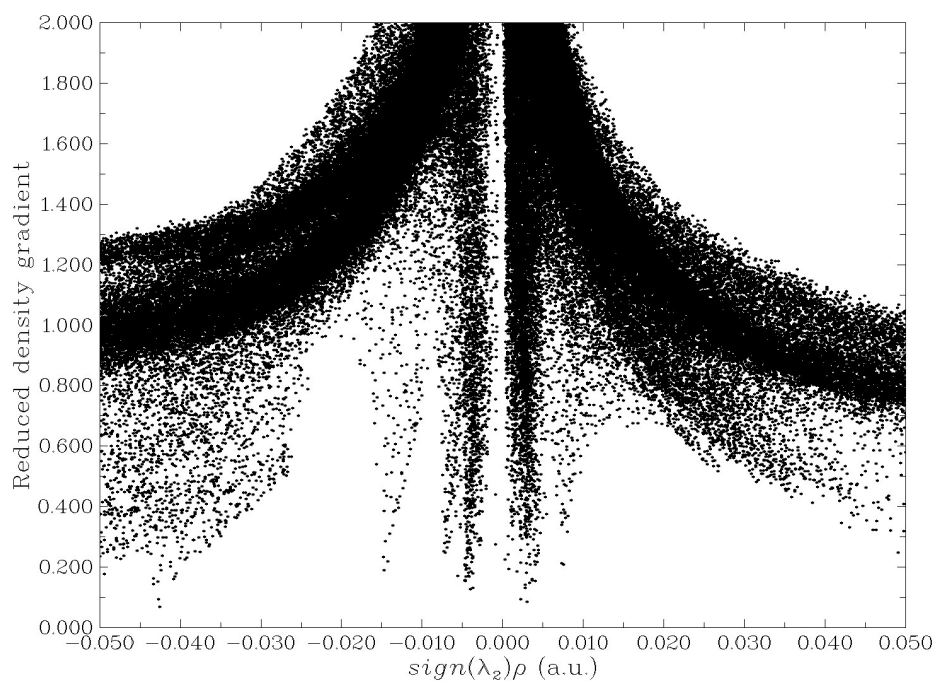**Fig. S1** Plots of the reduced density gradient versus the electron density multiplied by the sign of the second Hessian eigenvalue for  $[\text{Ag}_2(\text{N}_5)_2(\text{EDA})]_n$ .

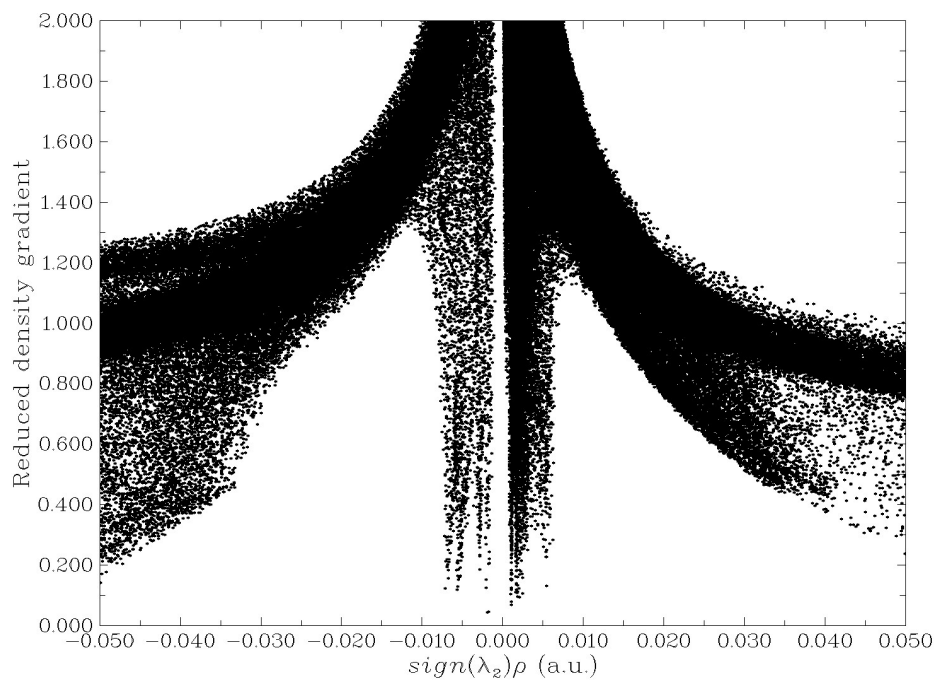

**Fig. S2** Plots of the reduced density gradient versus the electron density multiplied by the sign of the second Hessian eigenvalue for  $[Ag(N_5)]_n$ .

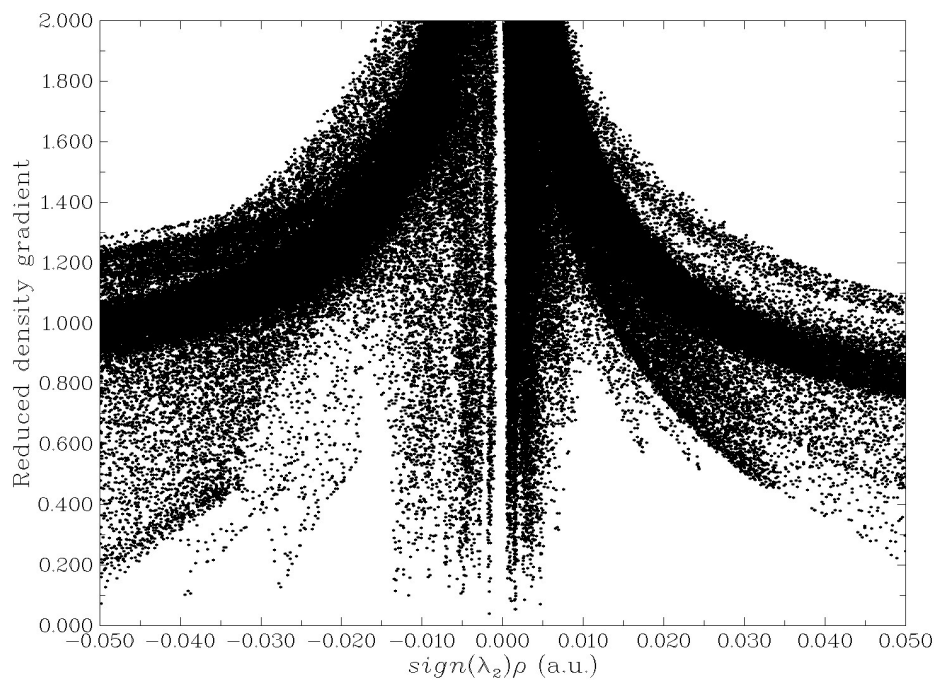

**Fig. S3** Plots of the reduced density gradient versus the electron density multiplied by the sign of the second Hessian eigenvalue for  $[Ag_3(N_5)_4]_n \cdot n[Ag(NH_3)_2]$ .

## 5. IR spectrum

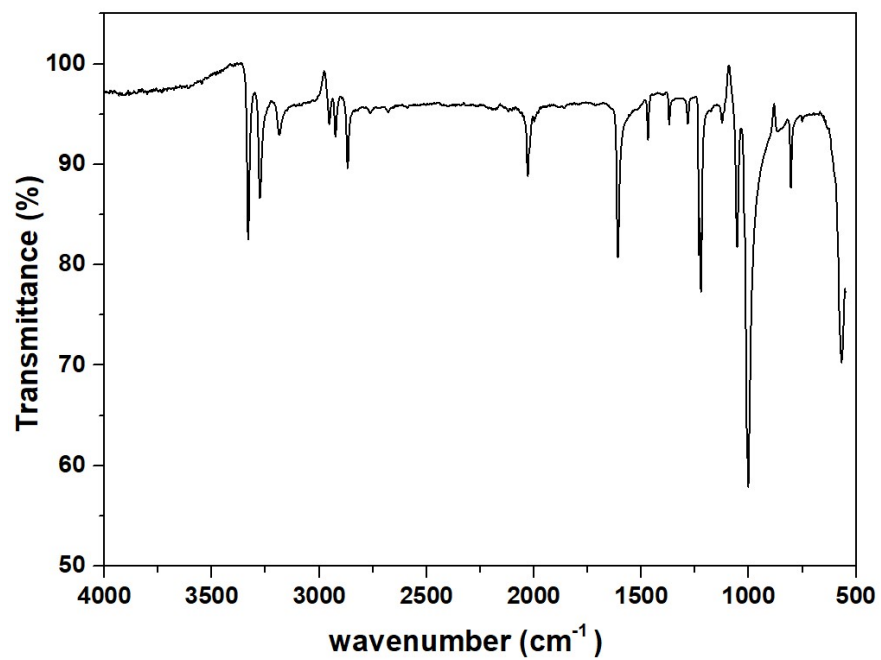

**Fig. S4** The IR spectrum of  $[\text{Ag}_2(\text{N}_5)_2(\text{EDA})]_n$ .

## 6. TG curve

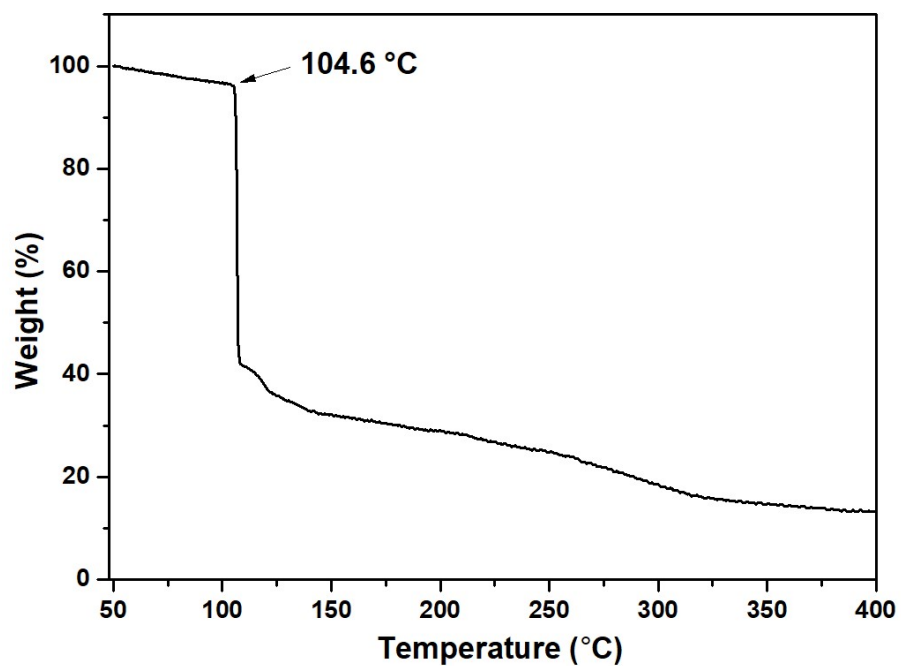

**Fig. S5** The TG curve of  $[\text{Ag}_2(\text{N}_5)_2(\text{EDA})]_n$ .

## Reference

- 1 Y. Xu, Q. Lin, P. Wang and M. Lu, *Chem. -Asian J.*, 2018, **13**, 1669-1673.
